# Supplementary material
Source: PubMed Central journal article supplement (PMC11071706)
Supplement: 18_2023_4996_MOESM1_ESM.pdf [file 18_2023_4996_MOESM1_ESM.pdf]

## Supplementary data

**Table S1. Silk-associate genes**

| <b>Gene Name</b>    | <b>Description</b>                                    | <b>Gene ID</b> | <b>Group</b>          |
|---------------------|-------------------------------------------------------|----------------|-----------------------|
| <i>Fib-H</i>        | fibroin heavy chain precursor                         | 693030         | silk proteins         |
| <i>Fib-L</i>        | Fibroin light chain                                   | 693047         | silk proteins         |
| <i>P25</i>          | fibroin P25                                           | 100146105      | silk proteins         |
| <i>sericin 1</i>    | sericin 1-like isoform X1                             | 101740082      | silk proteins         |
| <i>sericin 2</i>    | sericin 2-isoform 2 precursor                         | 100379325      | silk proteins         |
| <i>sericin 3</i>    | sericin 3 precursor                                   | 100136948      | silk proteins         |
| <i>SGF-1/Fkh</i>    | silk gland factor 1                                   | 692754         | transcription factors |
| <i>Awh</i>          | arrowhead PA                                          | 100862786      | transcription factors |
| <i>Ldb</i>          | LIM-domain binding protein                            | 101742826      | transcription factors |
| <i>Lcaf</i>         | single-stranded DNA-binding protein 3-like            | 101738257      | transcription factors |
| <i>SGF-3/POUM1</i>  | silk gland factor 3                                   | 693025         | transcription factors |
| <i>FMBP-1</i>       | fibroin-modulator-binding protein-1                   | 692516         | transcription factors |
| <i>Sage</i>         | helix-loop-helix protein 2-like                       | 101741094      | transcription factors |
| <i>Dimm</i>         | class A basic helix-loop-helix protein 15-like        | 101736973      | transcription factors |
| <i>Antp</i>         | antennapedia-like proteinue protein                   | 692747         | transcription factors |
| <i>inv</i>          | homeobox protein invected                             | 693024         | transcription factors |
| <i>en</i>           | segmentation polarity homeobox protein engrailed-like | 101739896      | transcription factors |
| <i>Pax3/7</i>       | protein gooseberry-like                               | 101741981      | transcription factors |
| <i>seroin 1</i>     | seroin 1 precursor                                    | 692598         | protease inhibitors   |
| <i>BmSPI16</i>      | serine protease inhibitor 16 precursor                | 100272180      | protease inhibitors   |
| <i>LOC101736771</i> | putative proteasome inhibitor-like isoform X1         | 101736771      | protease inhibitors   |
| <i>BmSPI28</i>      | serine protease inhibitor 28                          | 101737176      | protease inhibitors   |
| <i>BmSPI45</i>      | SCO-spondin-like                                      | 101739956      | protease inhibitors   |
| <i>BmSPI44</i>      | SCO-spondin-like                                      | 101742053      | protease inhibitors   |
| <i>LOC692611</i>    | BCP inhibitor precursor                               | 692611         | protease inhibitors   |
| <i>BmSPI2</i>       | serine protease inhibitor 2                           | 692573         | protease inhibitors   |
| <i>BmSPI37</i>      | fungal protease inhibitor F-like precursor            | 101738296      | protease inhibitors   |
| <i>BmSPI40</i>      | fungal protease inhibitor F-like                      | 101738036      | protease inhibitors   |
| <i>BmSPI39</i>      | SCO-spondin-like                                      | 101738036      | protease inhibitors   |
| <i>BmSPI38</i>      | fungal protease inhibitor F-like                      | 101738162      | protease inhibitors   |
| <i>BmSPI36</i>      | fungal protease inhibitor F-like isoform X1           | 101738434      | protease inhibitors   |
| <i>BmSPI3</i>       | serine protease inhibitor 3 precursor                 | 693100         | protease inhibitors   |
| <i>BmSPI68</i>      | serine protease inhibitor dipetalogastin-like         | 101747078      | protease inhibitors   |
| <i>BmSPI5</i>       | serine protease inhibitor 5 precursor                 | 692688         | protease inhibitors   |
| <i>BmSPI4</i>       | serine protease inhibitor 4 precursor                 | 692644         | protease inhibitors   |

**Table S2. Genes in JH signaling pathway with m<sup>6</sup>A methylation**

| chr         | strand | log2FC | pvalue | padj | Annotation | Gene ID   | Gene Name                             |
|-------------|--------|--------|--------|------|------------|-----------|---------------------------------------|
| NC_051380.1 | -      | 2.54   | 0      | 0    | CDS        | 732865    | <i>4-nitrophenylphosphatase</i>       |
| NC_051380.1 | -      | 7.44   | 0      | 0    | UTR5       | 101743457 | <i>Phosphoglycolate phosphatase 2</i> |
| NC_051359.1 | +      | 2.29   | 0      | 0    | UTR3       | 100101204 | <i>Hmg-r</i>                          |
| NC_051360.1 | -      | 2.05   | 0      | 0    | UTR3       | 100101206 | <i>Mppd</i>                           |
| NC_051359.1 | +      | 3.27   | 0      | 0    | UTR3       | 100101204 | <i>Hmg-r</i>                          |
| NC_051373.1 | -      | 2.6    | 0      | 0    | UTR3       | 100101205 | <i>Mk</i>                             |
| NC_051380.1 | -      | 2.16   | 0      | 0    | CDS        | 101743457 | <i>Phosphoglycolate phosphatase 2</i> |
| NC_051376.1 | -      | 2.37   | 0      | 0    | UTR5       | 100101203 | <i>Hmg-s</i>                          |
| NC_051376.1 | -      | 2.83   | 0      | 0    | UTR5       | 692988    | <i>Aldehyde dehydrogenase</i>         |
| NC_051378.1 | +      | 2.46   | 0      | 0    | UTR3       | 692835    | <i>Mpk</i>                            |
| NC_051376.1 | -      | 3.84   | 0      | 0    | UTR3       | 100101203 | <i>Hmg-s</i>                          |
| NC_051373.1 | -      | 3.56   | 0      | 0    | UTR5       | 100101205 | <i>Mk</i>                             |

**Table S3. Genes in JH signaling pathway with significantly different expression levels after knocking down *METTL3***

| Gene Name                                   | Gene_ID   | log2_(siM3 / _NC) | q value_(siM3 / _NC) |
|---------------------------------------------|-----------|-------------------|----------------------|
| <i>Hmg-r</i>                                | 100101204 | 0.77127354        | 0.02232639           |
| <i>Mk</i>                                   | 100101205 | 0.47927833        | 0.04957009           |
| <i>Juvenile hormone epoxide hydrolase 3</i> | 100307010 | -0.8515536        | 0.01615363           |
| <i>Cce-6</i>                                | 100500760 | -2.0811432        | 0.00957523           |
| <i>Phosphoglycolate phosphatase 2</i>       | 101743457 | 2.27616462        | 6.65E-12             |
| <i>Oxidoreductase</i>                       | 101746691 | 0.59403586        | 0.04533903           |
| <i>Oxidoreductase like</i>                  | 105842801 | 0.84949213        | 0.00871797           |
| <i>Fps</i>                                  | 692433    | -1.4330574        | 1.25E-07             |
| <i>Jhe1</i>                                 | 692579    | 3.25449722        | 6.85E-05             |
| <i>Jheh2</i>                                | 692686    | -1.4282115        | 1.28E-07             |
| <i>Aldehyde dehydrogenase</i>               | 692988    | -0.6329876        | 0.01897601           |
| <i>4-nitrophenylphosphatase</i>             | 732865    | 2.61377615        | 1.57E-17             |

**Table S4. The tendency of *BmSPI4*, *BmSPI5*, *sericin1*, and *sericin2* expression level and m<sup>6</sup>A modification regulated by knocking down *METTL3* and JHA treatment.**

| Treatment                   | Gene name       | m <sup>6</sup> A modification level | Expression level |
|-----------------------------|-----------------|-------------------------------------|------------------|
| Knocking down <i>METTL3</i> | <i>BmSPI4</i>   | Down                                | Down             |
|                             | <i>BmSPI5</i>   | Down                                | Up               |
|                             | <i>sericin1</i> | Down                                | Up               |
|                             | <i>sericin2</i> | Down                                | UP               |
| JHA                         | <i>BmSPI4</i>   | Up                                  | Up               |
|                             | <i>BmSPI5</i>   | Down                                | Up               |
|                             | <i>sericin1</i> | Up                                  | Down             |
|                             | <i>sericin2</i> | Down                                | Up               |

**Table S5. Primers used in the study**

| <b>Primers</b>     | <b>Sequence (5'-3')</b>                             | <b>Purpose</b>                 |
|--------------------|-----------------------------------------------------|--------------------------------|
| BmMETTL3-F         | CCCTATGGCACTATGTCCG                                 | qRT-PCR of <i>METTL3</i>       |
| BmMETTL3-R         | CGGTTCTGATGATGCGTTG                                 | qRT-PCR of <i>METTL3</i>       |
| seroin1-F          | TTCCTCATCCACGGTCAACG                                | qRT-PCR of <i>seroin1</i>      |
| seroin1-R          | TTCTTCGACGGCTTTCCGT                                 | qRT-PCR of <i>seroin1</i>      |
| BmYTHDF3-F         | AACAGCGGCATTTGGACAAC                                | qRT-PCR of <i>YTHDF3</i>       |
| BmYTHDF3-R         | GGCATACCAGGCCCTTTCTT                                | qRT-PCR of <i>YTHDF3</i>       |
| LOC101736771-F     | ATTGCCAAGAGCTGCGGT                                  | qRT-PCR of <i>LOC101736771</i> |
| LOC101736771-R     | GCCTTCTTCCCGGATGG                                   | qRT-PCR of <i>LOC101736771</i> |
| BmSPI4-F           | GCGCGTCTGGGAATACGA                                  | qRT-PCR of <i>BmSPI4</i>       |
| BmSPI4-R           | CGTGTTGACTCGGAGCCA                                  | qRT-PCR of <i>BmSPI4</i>       |
| BmRPL49-F          | CAGGCGGTTCAAGGGTCAATAC                              | qRT-PCR of <i>BmRpl</i>        |
| BmRPL49-R          | TGCTGGGCTCTTCCACGA                                  | qRT-PCR of <i>BmRpl</i>        |
| BmSPI5-F           | TCGATCAGACCGCGAACG                                  | qRT-PCR of <i>BmSPI5</i>       |
| BmSPI5-F           | TCTGGAGCGTCGTCCTGA                                  | qRT-PCR of <i>BmSPI5</i>       |
| Ldb-F              | GCGGCGTCTCAGAGTTGT                                  | qRT-PCR of <i>Ldb</i>          |
| Ldb-R              | CAGTCTGCCTTCCGTGCA                                  | qRT-PCR of <i>Ldb</i>          |
| sercin2-F          | AAGAGCGGCGTCACAGTC                                  | qRT-PCR of <i>sercin2</i>      |
| sercin2-R          | ACTCTTGCCTTCCGAGCC                                  | qRT-PCR of <i>sercin2</i>      |
| BmSPI4-clone-F     | ctcggtagcagctcggatccATGTGTCTTTTAAAATTTTGGTTTTG      | vector construction            |
| BmSPI4-clone-R     | gtgatgatgaccggtacgcgtGTAAGTGATGGCTCCGTATAAAAGC      | vector construction            |
| BmSPI5-clone-F     | ctcggtagcagctcggatccATGTATTCAATCGCGTTCGTTCT         | vector construction            |
| BmSPI5-clone-R     | gtgatgatgaccggtacgcgtATAGACAGTCGGTTTTGAATAAATACCA   | vector construction            |
| Pcold-YTHDF3-His-F | catatcgaaggtaggcatatgATGTCAGCAGGCGTGTCAGAT          | Protein expression             |
| Pcold-YTHDF3-His-R | agactgcaggtcgacaagctTTACCTATAGTAATCATCATATTGTTTTGCA | Protein expression             |
| pIZ/V5-BmSPI4-F    | GAACAACAGCTGCCGAGTAAC                               | qRT-PCR of <i>BmSPI4-Mut</i>   |
| pIZ/V5-BmSPI4-R    | TGGTGATGGTGATGATGACCGG                              | qRT-PCR of <i>BmSPI4-Mut</i>   |
| pIZ/V5-BmSPI5-F    | TGATATAGAGGTCACGGAATCGGG                            | qRT-PCR of <i>BmSPI5-Mut</i>   |
| pIZ/V5-BmSPI5-R    | TGGTGATGGTGATGATGACCGG                              | qRT-PCR of <i>BmSPI5-Mut</i>   |

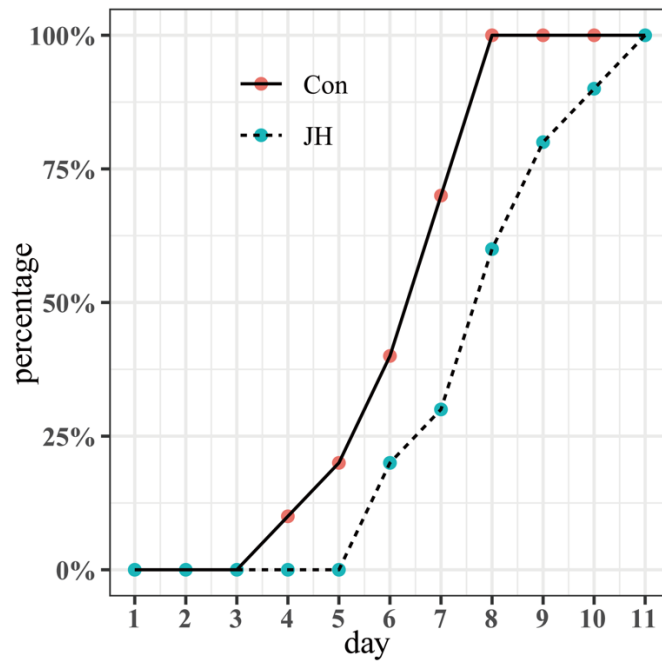

**Figure S1.** The length of 5th instar period of control and JHA treated silkworm larvae

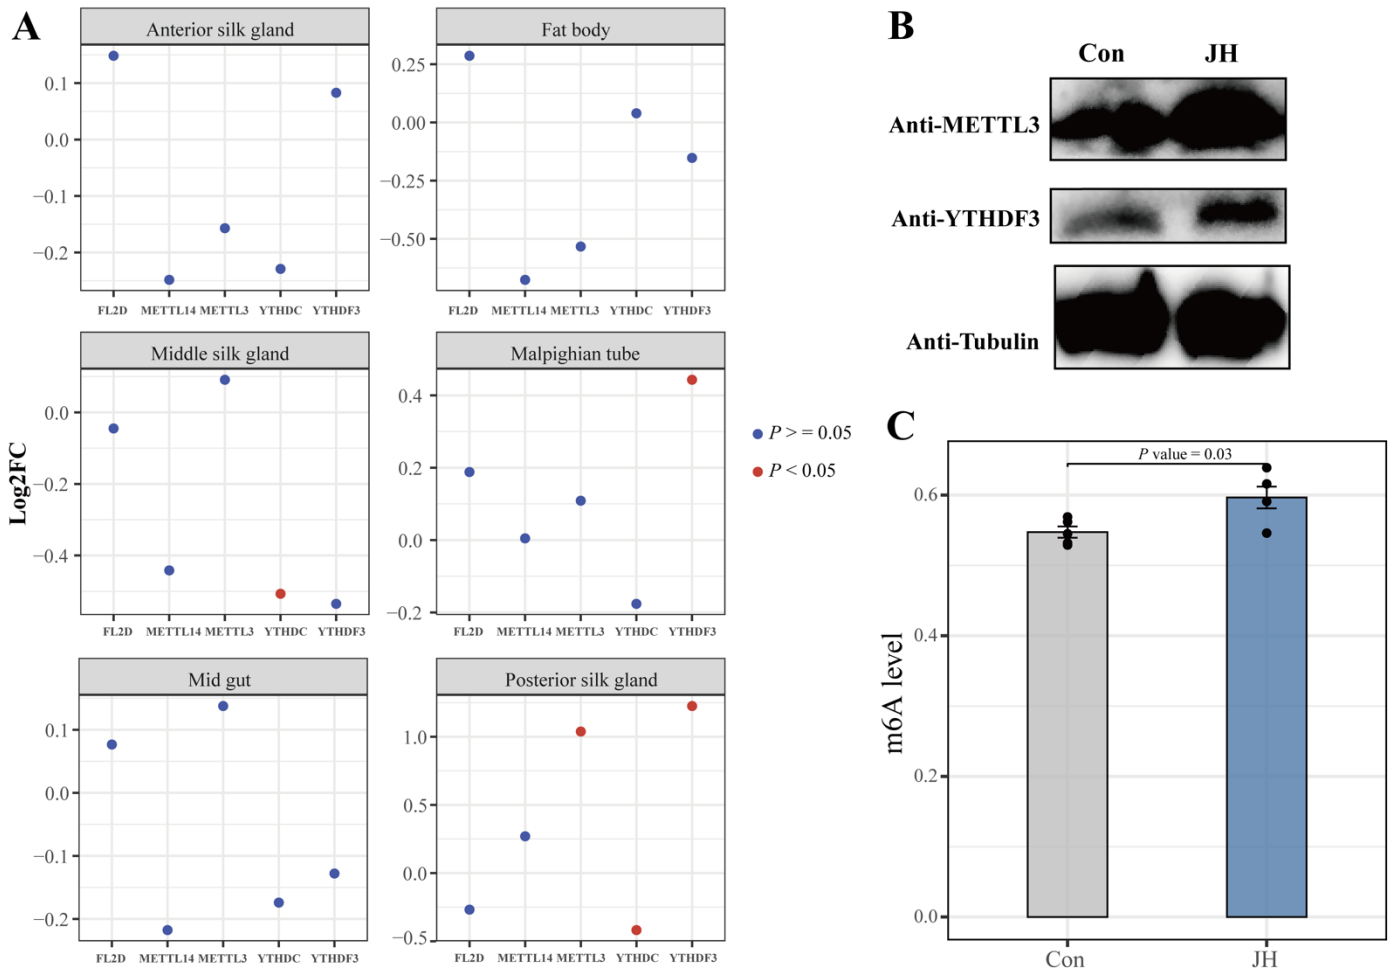

**Figure S2.** (A) Expression of m<sup>6</sup>A-related genes, *FL2D*, *METTL14*, *METTL3*, *YTHDC*, and *YTHDF3* in silkworm posterior silk gland, anterior silk gland, fat body, middle silk gland, midgut, and malpighian tube after JHA treatment for 24 h. (B) Protein expression of METTL3 and YTHDF3 in silkworm PSG after JHA treatment for 24 h were measured by western blot analysis. (C) m<sup>6</sup>A abundance of silkworm PSG after JHA treatment for 24 h.

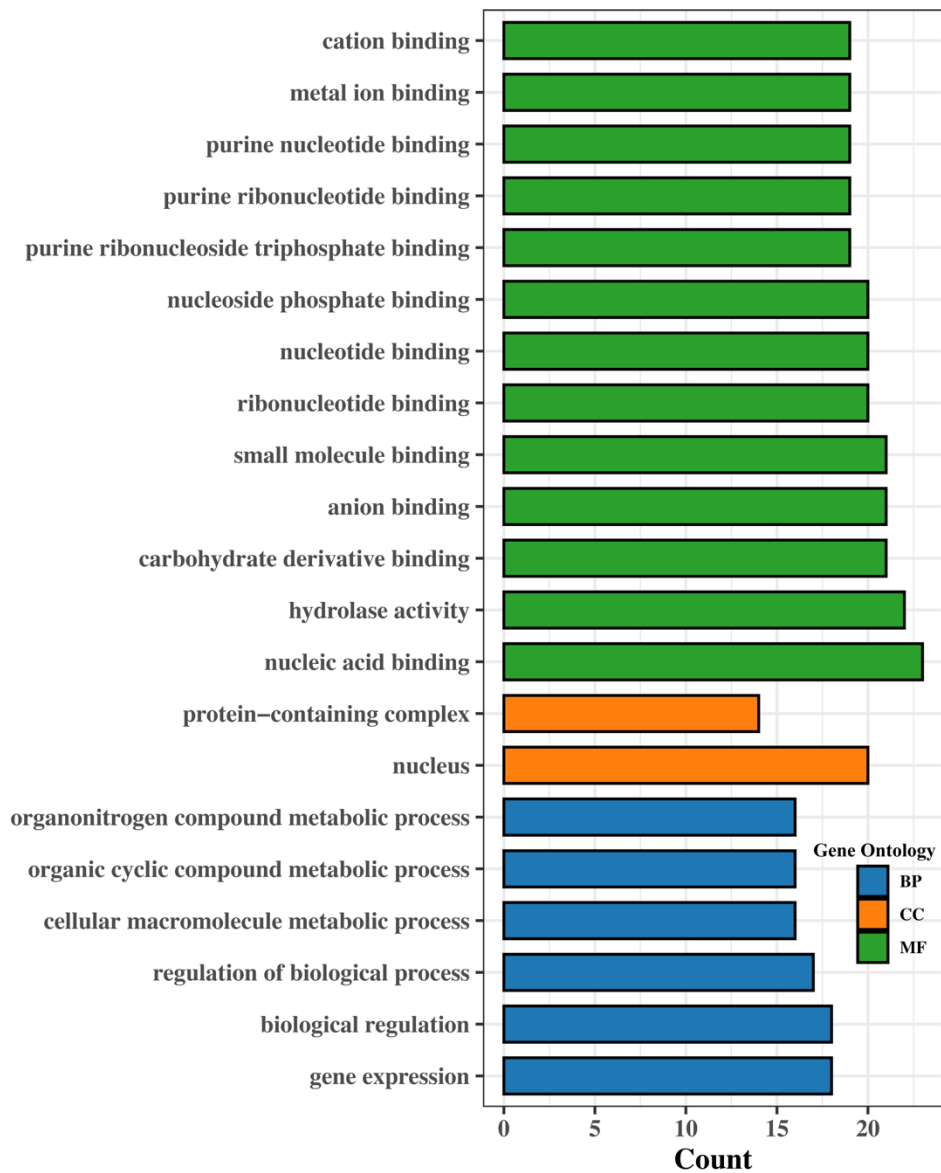

**Figure S3.** GO analysis of differentially expressed and different m<sup>6</sup>A modification genes identified in transcriptome sequencing and m<sup>6</sup>A sequencing data. GO terms were grouped into three classes, Biological Process (BP), Cellular Compounds (CC), and Molecular Function (MF).



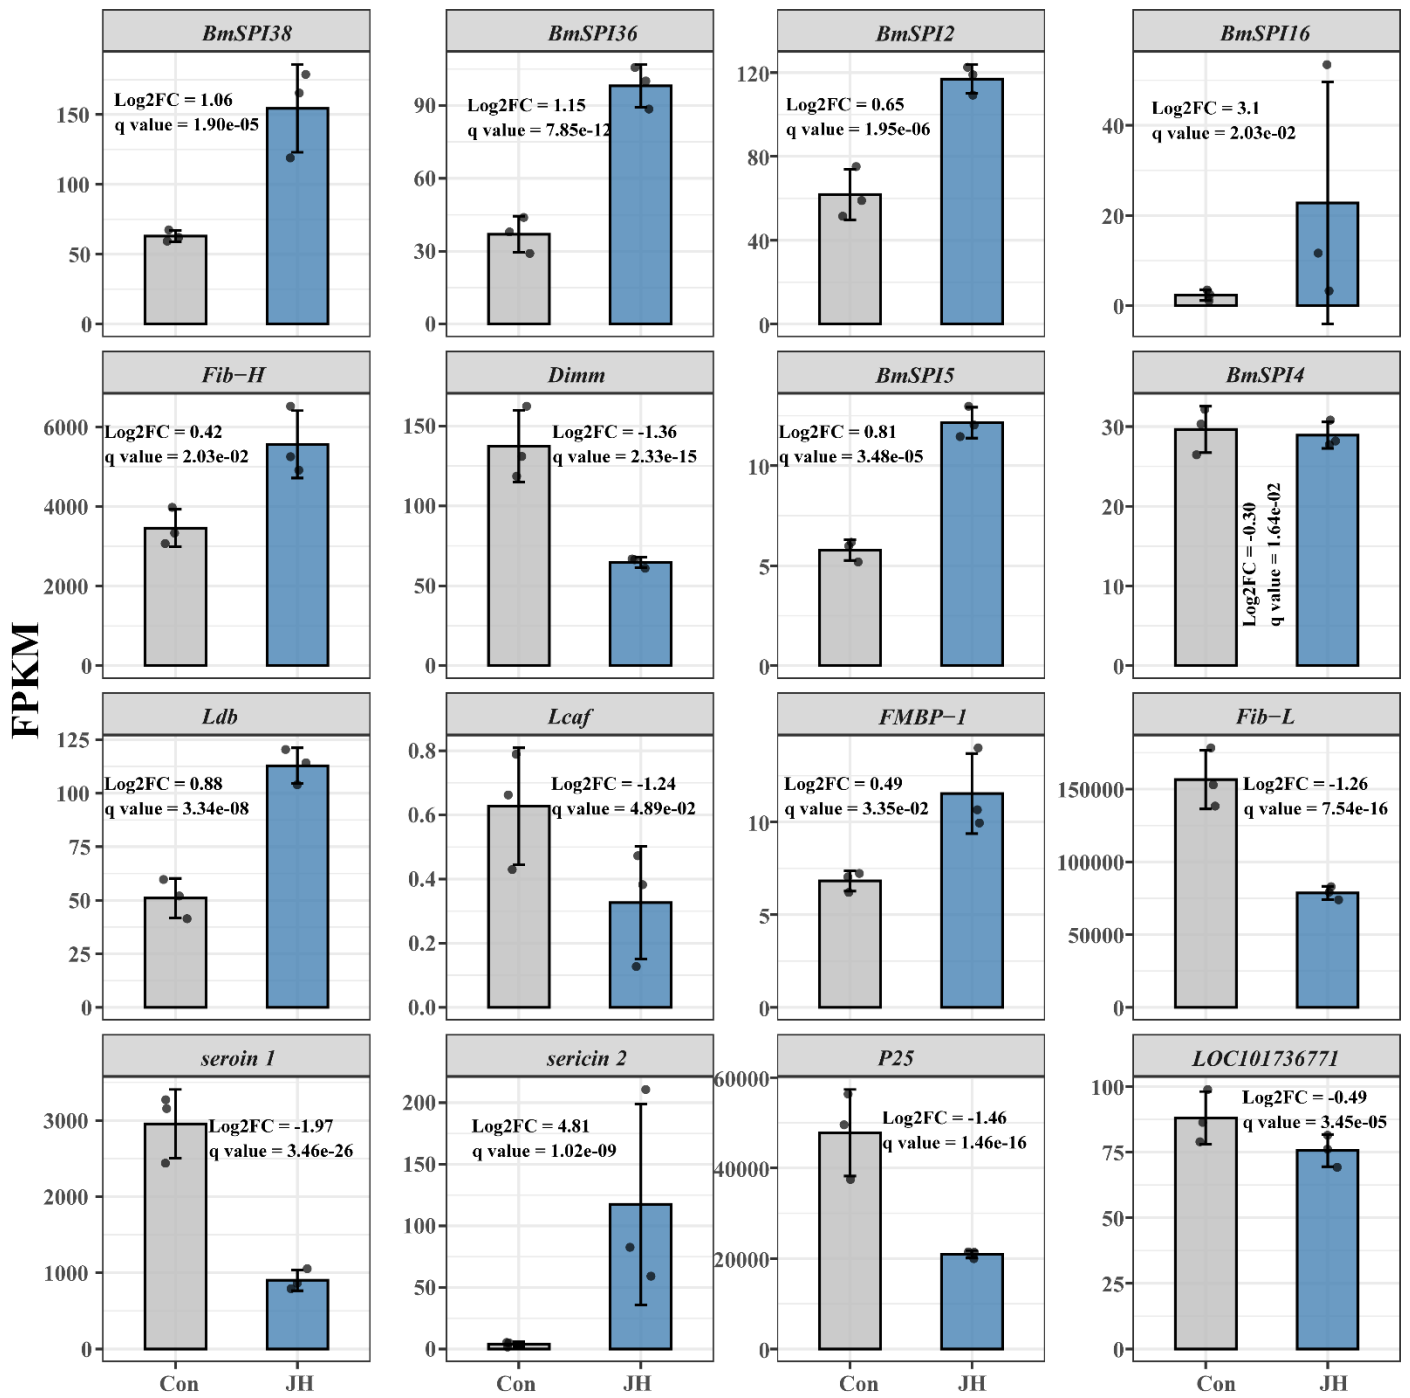

**Figure S4.** Many silk-associated genes have significantly different expression level in silkworm PSG after JHA treatment for 24 h.

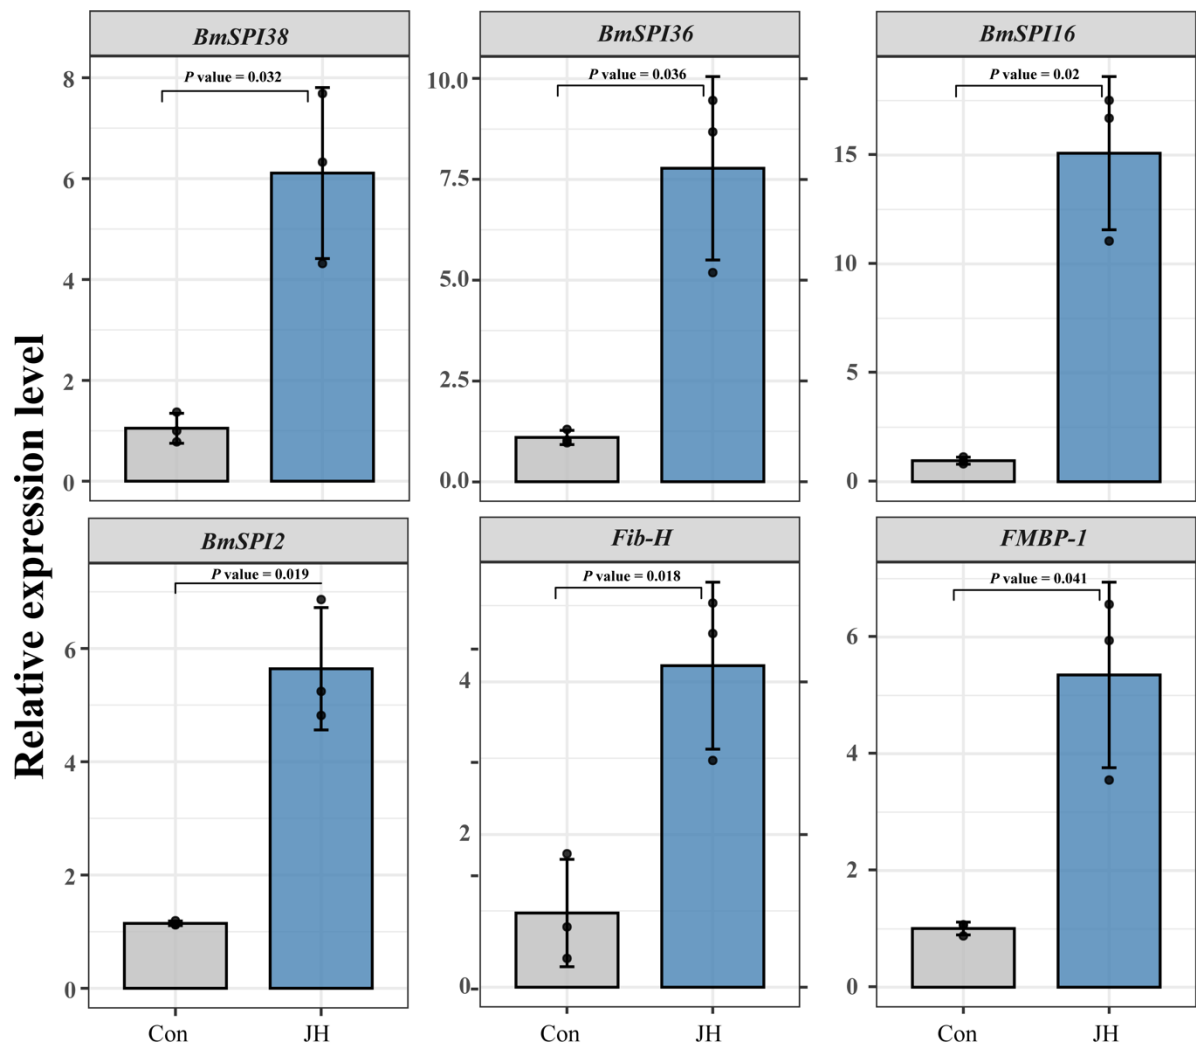

**Figure S5.** Six silk-associated genes were randomly selected for performing qPCR to identify the result of Transcriptome and MeRIP-sequencing data.

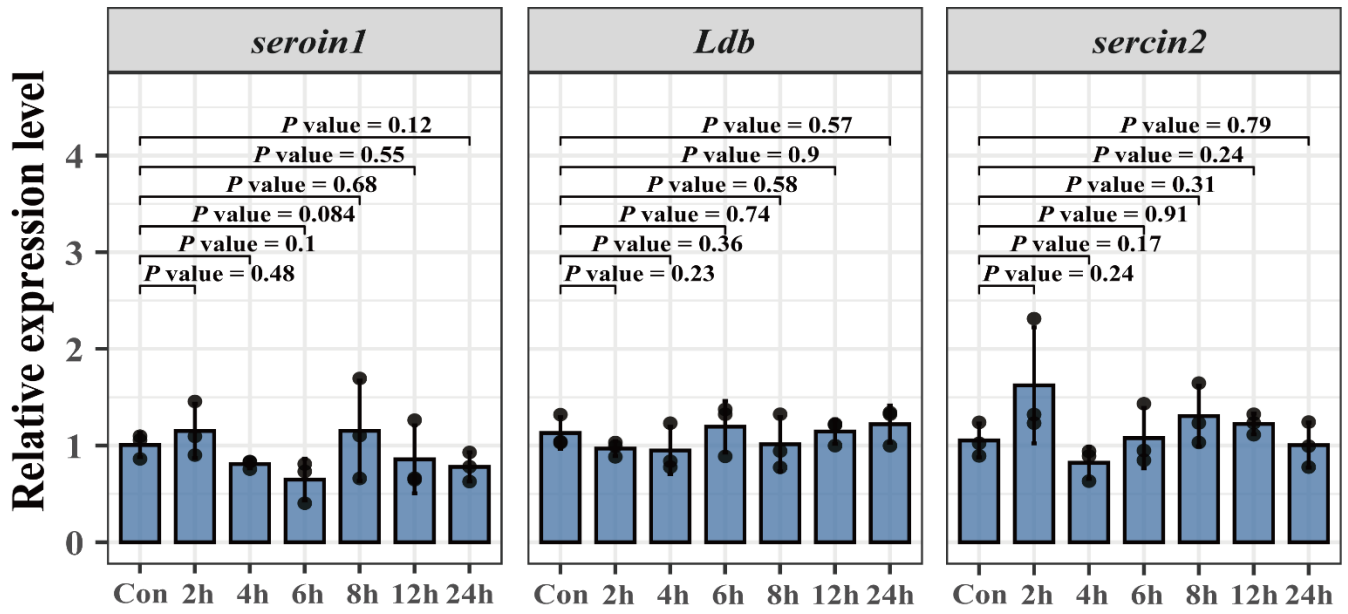

**Figure S6.** qPCR results of *seroin 1*, *Ldb*, and *sericin 2* in BmN cells after JHA treatment for 2 h, 4 h, 6 h, 8 h, 12 h, and 24 h.

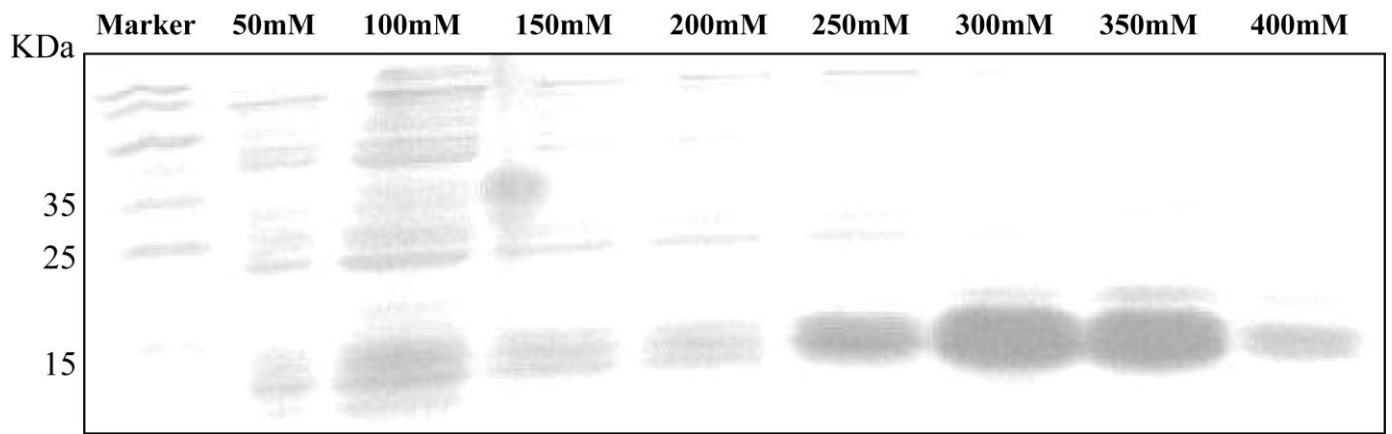

**Figure S7.** Recombinant His-tagged BmYTHDF3 protein were purified by nickel chromatography. The purified BmYTHDF3 were subjected to SDS-PAGE through a 10% SDS-polyacrylamide gel, and then stained with CBB. Molecular mass markers are shown to the left of the gel.
